# Supplementary material for: Ensemble learning based on efficient features combination can predict the outcome of recurrence-free survival in patients with hepatocellular carcinoma within three years after surgery
Source: PubMed Central journal article supplement (PMC9686395; doi:10.3389/fonc.2022.1019009), 2022-11-10
Supplement: DataSheet_1.pdf [file DataSheet_1.pdf]

# Appendix

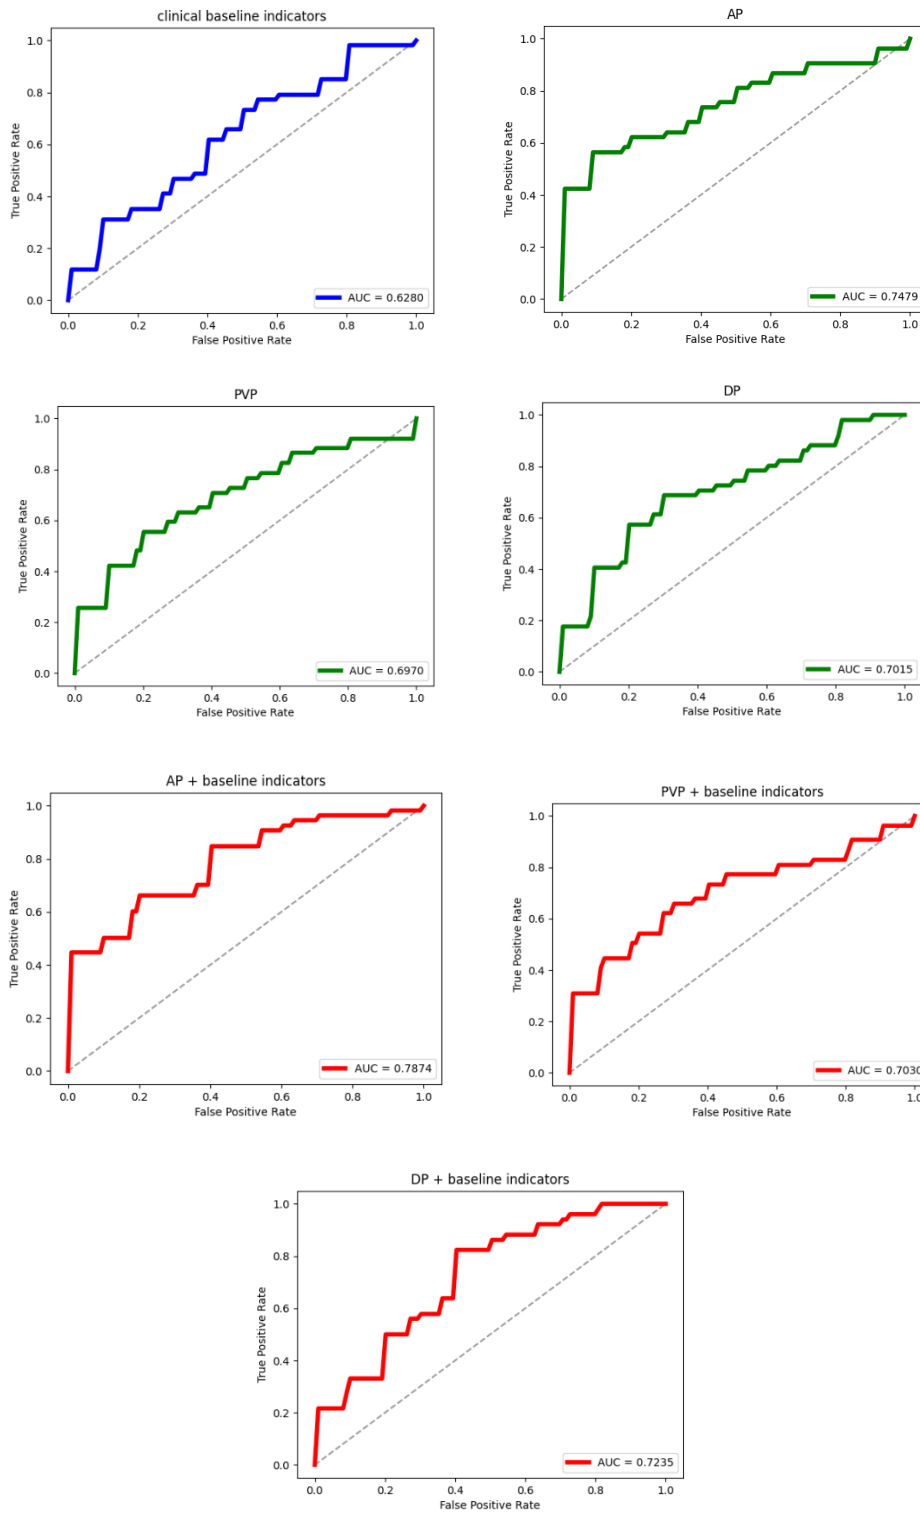

Fig 1: Results of using 7 feature representations in the Catboost model

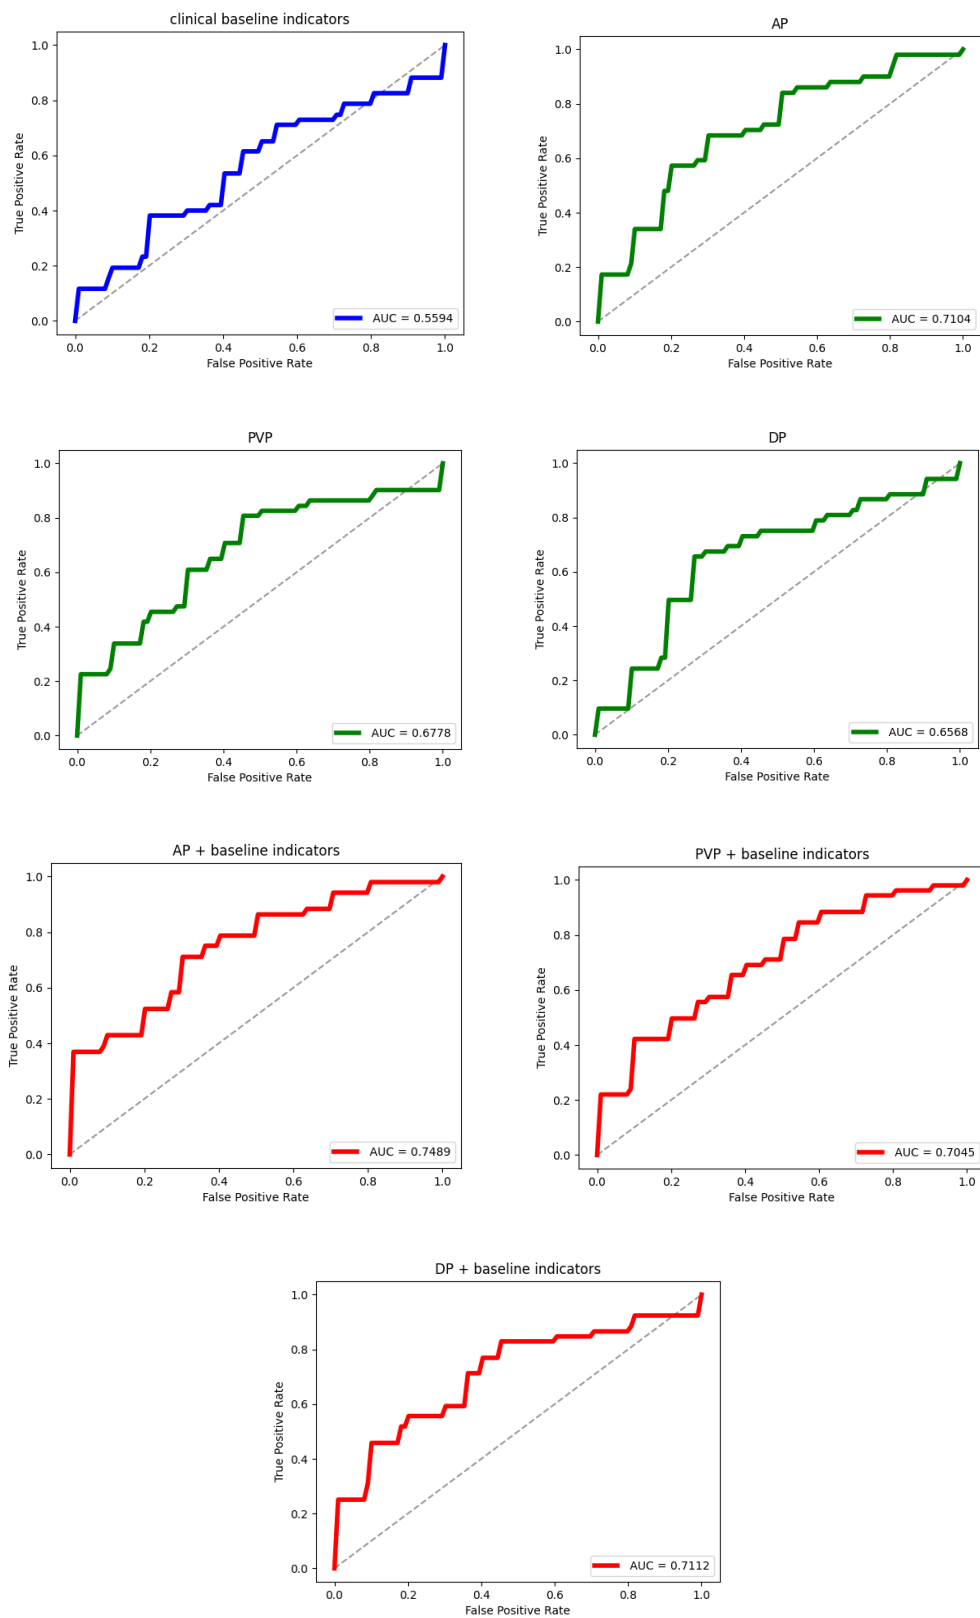

Fig 2: Results of using 7 feature representations in the XGBoost model

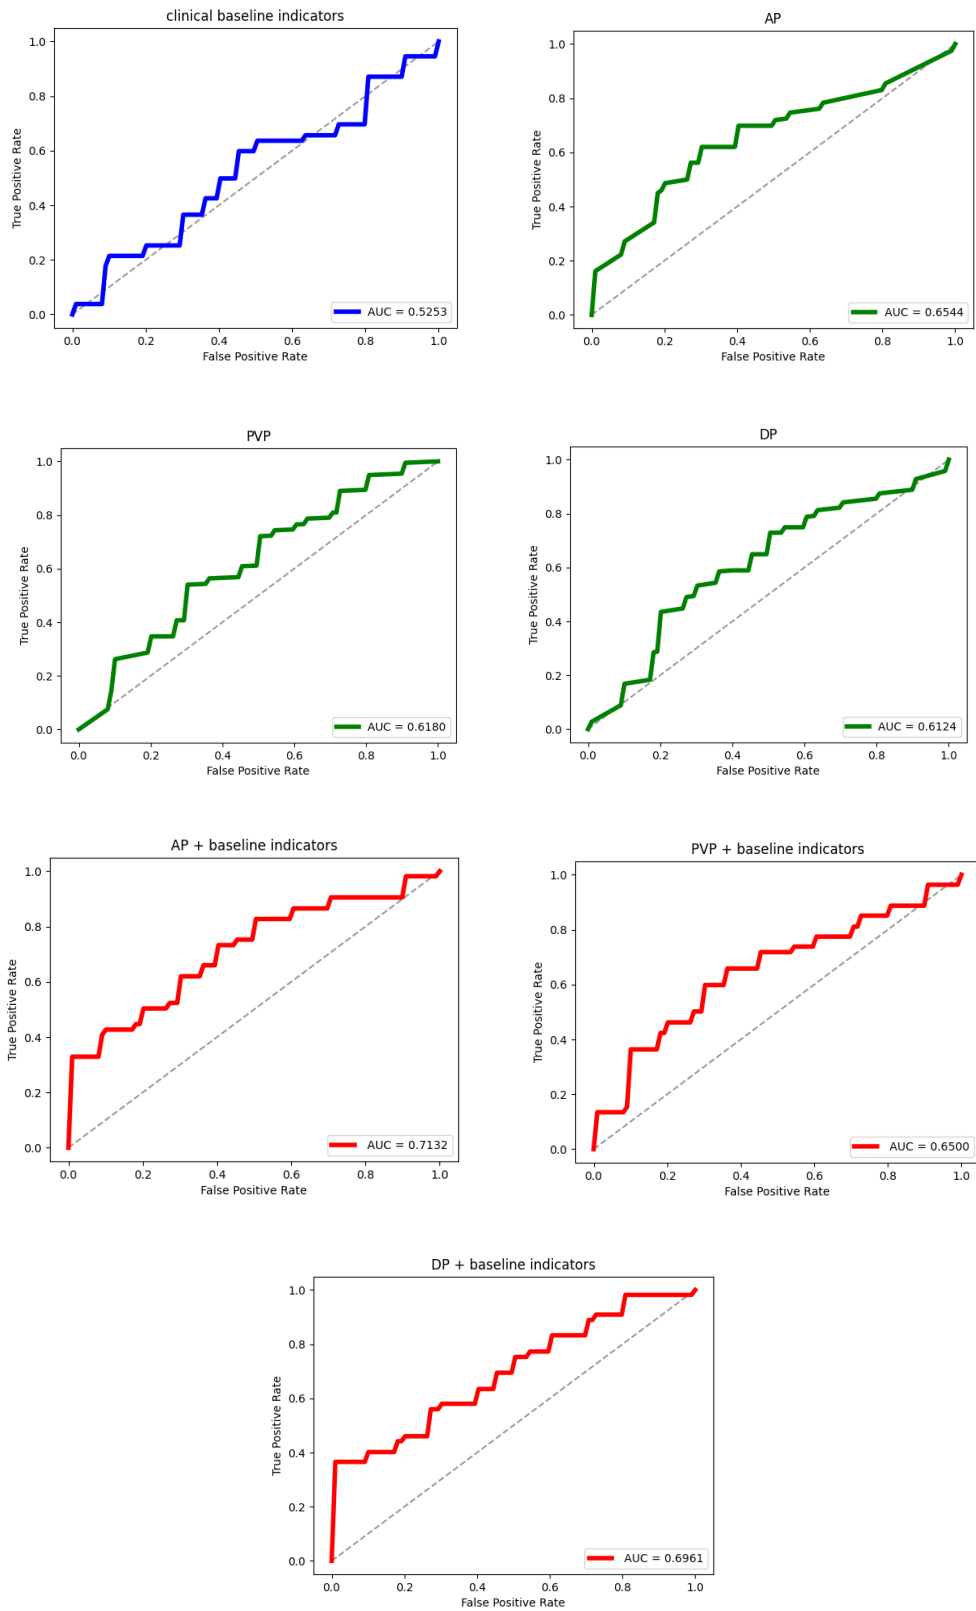

Fig 3: Results of using 7 feature representations in the GBDT model

Tab1: Other results of using 7 feature representations in the Catboost model

| feature      | Acc(%) | recall(%) | prec(%) | f1(%) |
|--------------|--------|-----------|---------|-------|
| AP+clinical  |        |           |         |       |
| avg          | 71.28  | 57.73     | 80.25   | 68.27 |
| 95%CI        | 11.37  | 8.24      | 16.77   | 11.10 |
| DP+clinical  |        |           |         |       |
| avg          | 67.29  | 65.64     | 71.50   | 66.67 |
| 95%CI        | 6.74   | 10.48     | 10.90   | 5.72  |
| PVP+clinical |        |           |         |       |
| avg          | 64.43  | 59.82     | 66.73   | 61.10 |
| 95%CI        | 5.61   | 17.35     | 8.46    | 10.49 |
| AP           |        |           |         |       |
| avg          | 69.29  | 62.00     | 77.14   | 67.05 |
| 95%CI        | 9.97   | 10.53     | 14.62   | 8.14  |
| DP           |        |           |         |       |
| avg          | 63.38  | 61.46     | 64.26   | 62.16 |
| 95%CI        | 6.63   | 10.96     | 7.97    | 8.33  |
| PVP          |        |           |         |       |
| avg          | 63.38  | 59.46     | 65.20   | 62.12 |
| 95%CI        | 9.26   | 7.07      | 11.32   | 8.91  |
| clinical     |        |           |         |       |
| avg          | 56.76  | 48.54     | 58.69   | 51.69 |
| 95%CI        | 4.31   | 14.46     | 4.94    | 7.58  |

Tab2: Other results of using 7 feature representations in the XGBoost model

| feature      | acc(%) | recall(%) | prec(%) | f1(%) |
|--------------|--------|-----------|---------|-------|
| AP+clinical  |        |           |         |       |
| avg          | 73.95  | 69.09     | 77.02   | 72.34 |
| 95%CI        | 9.59   | 12.86     | 10.57   | 10.96 |
| DP+clinical  |        |           |         |       |
| avg          | 66.52  | 69.09     | 69.16   | 67.12 |
| 95%CI        | 10.69  | 15.06     | 15.32   | 10.94 |
| PVP+clinical |        |           |         |       |
| avg          | 67.29  | 61.82     | 71.62   | 65.16 |
| 95%CI        | 3.26   | 7.92      | 8.10    | 3.29  |
| AP           |        |           |         |       |
| avg          | 66.19  | 59.27     | 68.61   | 62.65 |
| 95%CI        | 9.37   | 15.20     | 12.15   | 12.67 |
| DP           |        |           |         |       |
| avg          | 63.52  | 61.64     | 64.63   | 61.44 |
| 95%CI        | 6.00   | 16.30     | 10.52   | 10.81 |
| PVP          |        |           |         |       |
| avg          | 63.52  | 59.27     | 63.88   | 60.43 |
| 95%CI        | 6.55   | 15.55     | 7.13    | 11.55 |
| clinical     |        |           |         |       |
| avg          | 54.86  | 59.64     | 56.23   | 57.18 |
| 95%CI        | 6.52   | 2.55      | 9.16    | 3.44  |

Tab3: Other results of using 7 feature representations in the GBDT model

| feature      | acc(%) | recall(%) | prec(%) | f1(%) |
|--------------|--------|-----------|---------|-------|
| AP+clinical  |        |           |         |       |
| avg          | 64.29  | 62.00     | 67.85   | 63.32 |
| 95%CI        | 11.80  | 14.94     | 16.05   | 11.74 |
| DP+clinical  |        |           |         |       |
| avg          | 58.52  | 57.64     | 57.80   | 57.12 |
| 95%CI        | 9.16   | 16.23     | 7.38    | 11.24 |
| PVP+clinical |        |           |         |       |
| avg          | 60.71  | 54.00     | 61.29   | 56.69 |
| 95%CI        | 6.80   | 14.46     | 7.17    | 10.92 |
| AP           |        |           |         |       |
| avg          | 63.48  | 58.18     | 66.95   | 61.42 |
| 95%CI        | 8.93   | 11.13     | 10.76   | 8.28  |
| DP           |        |           |         |       |
| avg          | 59.48  | 64.91     | 57.72   | 60.86 |
| 95%CI        | 9.57   | 14.76     | 8.81    | 11.35 |
| PVP          |        |           |         |       |
| avg          | 56.71  | 47.64     | 59.36   | 50.92 |
| 95%CI        | 4.63   | 12.88     | 6.70    | 10.15 |
| clinical     |        |           |         |       |
| avg          | 49.86  | 46.18     | 51.54   | 48.54 |
| 95%CI        | 15.50  | 12.60     | 17.63   | 14.76 |
